# Supplementary material
Source: publisher site journal article supplement (https://www.dovepress.com/article/488559)
Supplement: Supplementary file 1 [file get_supplementary_file.php]

Characterizing Patient Perceptions of Living with Geographic Atrophy: The Global Geographic Atrophy Insights Survey

*Supplemental Materials*

[**Supplemental File 1.** Apellis GA Patient Survey – Final Questionnaire 2](#_Toc182620326)

[**Supplementary Table S1.** Extended patient characteristics and interactions with eye care professionals (ECPs) 27](#_Toc182620327)

[**Supplementary Table S2.** Symptoms currently experienced by respondents 30](#_Toc182620328)

[**Supplementary Table S3.** Which of the following adjectives describe how you feel as a result of your vision loss or impairment due to advanced dry AMD? 32](#_Toc182620329)

# **Supplemental File 1.** Apellis GA Patient Survey – Final Questionnaire

**SECTION 600: SAMPLE PRELOAD AND SCREENER**

**BASE: ALL ONLINE RESPONDENTS**

**scrIntro**

During the survey, please do not use your browser's FORWARD and BACK buttons. Instead, please always use the button below to move through the survey. Please be aware that once you've answered a question, you might not be able to go back and change your answer.

The progress bar below indicates approximately what portion of the survey you have completed.

Simply click on the button at the bottom of the page to begin the survey.

**BASE: ALL ONLINE RESPONDENTS**

**scrIntroB** If it would be easier for you, you may have a loved one or caregiver assist you in completing this survey or complete the survey on your behalf. Are you taking the survey on your own, or is someone else completing the survey on your behalf?

1. I am completing the survey on my own
2. Someone is completing the survey on my behalf

**BASE: ALL ONLINE RESPONDENTS BEING COMPLETED BY CAREGIVER**

**scrIntroC**

You mentioned that you are completing this survey on someone else’s behalf. Throughout the survey, please read and answer each question from the perspective of the individual you are taking the survey for.

**BASE:   ALL ONLINE RESPONDENTS**

**dmConsent**

Thank you for agreeing to participate in this survey.  Your views are important to us and your answers will be kept in strict confidence. Please click here to read our privacy policy before agreeing to continue with the survey.

1.            I agree to continue

2.            I do not agree

**BASE: ALL ONLINE RESPONDENTS**

**dmCntry** **[Country]** In which country or region do you currently reside?

[LIST OF COUNTRIES DISPLAYED IN ALPHABETICAL ORDER]

**BASE: ALL PHONE RESPONDENTS**

**scrIntro2** Hello, my name is _______________________ and I'm calling on behalf of The Harris Poll, a national research firm. We would like to ask you a few questions on a confidential basis about your thoughts and feelings about your health. The survey will take approximately 15 minutes. May I please speak with the head of the household?

1. Yes, continue

2. Not available/schedule call back

99. DO NOT READ: REFUSED

**BASE: ALL PHONE RESPONDENTS**

**scrIntro2b** This call may be monitored or recorded for quality assurance purposes.

**BASE: ALL PHONE RESPONDENTS**

**Q500** Are you 60 years of age or older?

1. Yes - CONTINUE

2. No - CONTINUE

99. DO NOT READ: Don’t know//Refused

**BASE: PHONE AND IF PERSON NOT 60+ YEARS (Q500/2)**

**Q505**  Is there anyone else in your household who is at least 60 years of age?

1. Yes
2. No
3. DO NOT READ: Don't know/Refused

**BASE: SOMEONE ELSE 60+ AVAILABLE (Q505/1)**

**Q510**  May I speak with that person, please?

1. Yes, respondent coming to phone
2. No, not available right now
3. DO NOT READ: Don't know/Refused

**BASE:    ALL CONTINUING RESPONDENTS (Q510/1)**

**Q512**   Hello, my name is _______________________ and I'm calling on behalf of The Harris Poll, a national research firm.  We would like to ask you a few questions on a confidential basis about your thoughts and feelings about your health.  The survey will take approximately 15 minutes.

**BASE: ALL RESPONDENTS**

**dmGen [Gender]** Are you…?

1. Male

2. Female

3. Other

4. Prefer not to answer

1. NOT SURE/REFUSED

**BASE: ALL RESPONDENTS**

**dmAge [Age]** What is your age?

[RANGE 0 -120]

|_|_|_|

99. NOT SURE/REFUSED

**BASE: ALL RESPONDENTS**

**Q600** Have you ever been diagnosed by a doctor with any of the following? Please select all that apply./Please give me a ‘yes’ or ‘no’ for each.

1. Cataracts

2. Age-related macular degeneration (AMD)

3. Glaucoma

4. Stargardt disease

5. Diabetic eye disease

7. Heart disease

8. Dementia

98. None of the above

99. NOT SURE/REFUSED

**BASE: ALL RESPONDENTS**

**Q605** Have you been receiving injections into one or both of your eyes within the past 3 months?

1. Yes
2. No

99. NOT SURE/REFUSED

**BASE: ALL RESPONDENTS**

**Q610** As you may know, there are two types of age-related macular degeneration or AMD, dry AMD and wet AMD.

Dry AMD includes early, intermediate, and advanced dry AMD (sometimes called Geographic Atrophy or GA). Dry AMD is the most common form of AMD.

Wet AMD is rarer and impacts approximately 10% of those with AMD. If you have wet AMD, your eye care professional may have told you that the blood vessels in your eye or eyes are 'leaking.’

Please indicate whether you have **dry/wet** AMD in either eye.

IF PHONE: Do you have (READ ROW) in your (READ COLUMNS)?

[COLUMN]

1. Left eye only

2. Right eye only

3. Both eyes

4. Neither eye

5. Not sure/don’t know

[ROWS; RANDOMIZE]

1. **Dry** AMD

2. **Wet** AMD

**BASE: ALL RESPONDENTS WITH GA IN BOTH EYES (Q610_1/3)**

**Q615a**    Does your eye care professional use any of the following terms to describe your dry age-related macular degeneration or dry AMD?

Please answer for each eye/ Which eye or eyes, if any, have they described as having (READ ROW), your (READ COLUMNS)…?

[COLUMN]

1.           Left eye only

2.           Right eye only

3.           Both eyes

4.           Neither eye

5.           Not sure/don’t know which eye

[ROWS; RANDOMIZE]

1.           Advanced atrophic age-related macular degeneration or advanced atrophic AMD

2.           Advanced, late, or late-stage dry age-related macular degeneration or advanced dry AMD

3.           Geographic Atrophy (GA)

**BASE: ALL RESPONDENTS WITH GA IN ONE EYE (Q610_1/1 OR 2)**

**Q615b**   Does your eye care professional use any of the following terms to describe your dry age-related macular degeneration or dry AMD?

IF PHONE: Have they described it as…?

1.           Advanced atrophic age-related macular degeneration or advanced atrophic AMD

2.           Advanced, late, or late-stage dry age-related macular degeneration or advanced dry AMD

3.           Geographic Atrophy (GA)

4.           None of these

**BASE: ALL RESPONDENTS**

**Q620** Are you currently experiencing the following? Please select one./Please give me a ‘yes’ or ‘no’ for each.

[COLUMNS]

1. Yes

2. No

3. Decline to answer

[ROWS; RANDOMIZE] [ANCHOR CODE 14] [HOLD 3-4 AND 9-10 TOGETHER]

1. Visual distortions, such as straight lines seeming bent

2. Reduced central vision in one or both eyes

3. The need for brighter light when reading or doing close-up work

4. The need for a magnifier when reading or doing close-up work

5. Difficulty following lines when reading text in printed materials (for example, books or newspapers)

6. Decreased intensity or brightness of colors

7. Difficulty recognizing people’s faces

8. A well-defined blurry spot or blind spot in your field of vision

9. Inability to drive at any time of day due to vision loss or impairment

10. Inability to drive at night (in the dark) due to vision loss or impairment

11. Difficulty adjusting your vision to changes in light (for example, moving from sunshine into shade and vice versa or turning on a lamp)

12. Challenges carrying out daily tasks due to vision loss or impairment

13. Inability to read or severe difficulty when reading (for example, decrease in reading speed or missing letters while reading)

14. Other eye symptoms (for example, dryness or pain in eyes)

**BASE: CONTINUING PHONE RESPONDENTS WITH ADVANCED ATROPHIC AMD, ADVANCED DRY AMD, OR GA**

**Q622a** For the remainder of the questions we will focus on advanced dry age-related macular degeneration also known as Geographic Atrophy (GA) or Atrophic AMD and refer to it as **advanced dry AMD**.

**BASE: CONTINUING ONLINE RESPONDENTS WITH ADVANCED ATROPHIC AMD, ADVANCED DRY AMD, OR GA WHO ARE HAVING A CAREGIVER COMPLETE THE SURVEY ON THEIR BEHALF**

**Q622b** For the remainder of the questions we will focus on advanced dry age-related macular degeneration also known as Geographic Atrophy (GA) or Atrophic AMD and refer to it as **advanced dry AMD**.

**BASE: CONTINUING ONLINE RESPONDENTS WITH ADVANCED ATROPHIC AMD, ADVANCED DRY AMD, OR GA WHO ARE COMPLETING THE SURVEY ON THEIR OWN**

**Q622c** For the remainder of the questions we will focus on advanced dry age-related macular degeneration also known as Geographic Atrophy (GA) or Atrophic AMD and refer to it as **advanced dry AMD**.

As a reminder, if it would be easier for you, you may have a loved one or caregiver assist you in completing this survey or complete the survey on your behalf. Are you taking the survey on your own, or is someone else completing the survey on your behalf?

1. I am completing the survey on my own
2. Someone is completing the survey on my behalf

**BASE: CONTINUING ONLINE RESPONDENTS WITH ADVANCED ATROPHIC AMD, ADVANCED DRY AMD, OR GA WHO ARE HAVING A CAREGIVER COMPLETE THE SURVEY ON THEIR BEHALF**

**Q623** You mentioned that you are completing this survey on someone else’s behalf. Throughout the survey, please read and answer each question from the perspective of the individual you are taking the survey for.

**BASE: RESPONDENTS** **WITH ADVANCED ATROPHIC AMD, ADVANCED DRY AMD, OR GA**

**Q625** For the activity/activities listed below are you now doing it, have you done it in the past, or has it been suggested to you by your eye care professional to help limit the impact of your **advanced dry AMD**?]

Is (READ ROW) something that you (READ COLUMN)?]

[COLUMN; FOR PHONE: SHOW/READ COLUMNS 1-4 IN OPPOSITE ORDER FROM 4 TO 1]

1. Never or Not sure if suggested by eye care professional

2. Have never done but was suggested by an eye care professional

3. Used to do

4. Do currently

99. NOT SURE/REFUSED

[ROWS; RANDOMIZE]

1. Taking a high-dose of antioxidant vitamins and minerals [IF US, SHOW: “or AREDS2”]

2. Stopping smoking

3. Maintaining a healthy weight and exercising regularly

4. Choosing a healthy diet

5. Managing other medical conditions

6. Having check-ups of the retina regularly

7. Receiving injections into the affected eye about every four to six weeks

8. Wearing sunglasses with UV protection

**BASE: RESPONDENTS WITH ADVANCED ATROPHIC AMD, ADVANCED DRY AMD, OR**

**Q630** In what year were you diagnosed with **advanced dry AMD**?

[IF ONLINE: Please enter a 4 digit year.]

|_|_|_|_|

99. NOT SURE/REFUSED

**BASE: RESPONDENTS WITH ADVANCED ATROPHIC AMD, ADVANCED DRY AMD, OR GA**

**Q635** Are you currently participating in any clinical trials for **advanced dry AMD** where you are receiving medication as part of the clinical trial?

1. Yes

2. No

99. NOT SURE/REFUSED

**Qualified respondents will be:**

- Reside in US, UK, CA, AU, FR, DE, NL, IT, SE (dmCntry/244, 14, 42, 76, 85, 123, 168, 243, 223)
- Age 60+ (damage/60+)
- Have been diagnosed with age-related macular degeneration (AMD) (Q600/2)
- Have NOT been diagnosed with Glaucoma, Stargardt disease, or Dementia (Q600/NOT 3,4,8)
- Have dry AMD in at least one eye (Q610R1/C1-3)
- Have advanced atrophic age-related macular degeneration or advanced atrophic AMD, Advanced/late/late- stage dry age-related macular degeneration or advanced dry AMD or Geographic Atrophy (GA) in one or both of their eyes (c1-3 for ANY of Q615Ar1-3 OR Q615B ANY OF CODES 1-3)
- Are currently experiencing at least 3 GA symptoms (Any 3+ of Q620/1-13)
- Currently do, used to do, or have been suggested by eye care professional but have never done at least one of the following: Take a high-dose formulation of antioxidant vitamins and minerals, stop smoking, maintain a healthy weight and exercise regularly, choose a healthy diet, manage other medical conditions, have check-ups of the retina regularly, or wear sunglasses with UV protection (must select column 2-4 for at least one of Q625/1-6, 8)
- Must have never (or not sure if) received injections into the affected eye about every four to six weeks with a medicine such as Avastin, Lucentis, Eylea (Q625/7 NOT columns 2-4)

**SECTION 800: DISEASE AWARENESS/PROGRESSION**

**BASE: ALL QUALIFIED RESPONDENTS**

**Q800** [IF ONLINE AND CAREGIVER: As a reminder, please answer each question from the perspective of the individual you are taking the survey for.]

[IF ONLINE: As far as you know, is the following statement about **advanced dry age-related macular degeneration (advanced dry AMD)** true, false, or are you not sure?]

[IF PHONE SHOW: As far as you know, is the following statement about **advanced dry AMD** true, false, or are you not sure? The first/next one is (SAY FIRST FOR FIRST ROW AND NEXT FOR ALL FOLLOWING ROWS; READ ROW).

Is this statement… (READ SCALE FOR EACH)?]

[COLUMN]

1. True

2. False

3. Not sure

99. NOT SURE/REFUSED

[ROWS; RANDOMIZE] [IF ONLINE PLEASE DISPLAY ONE ROW AT A TIME/ON SEPARATE SCREENS]

1. It continuously progresses (that is, worsens over time), leading to permanent damage to the retina and vision loss.

2. It leads to retinal damage that can be reversed or repaired.

3. The rate of progression is the same for most patients.

4. Wet AMD is the only form of AMD that can cause blindness.

5. Advanced dry AMD can lead to worsening of vision in as little as 2 years for some patients.

6. Advanced dry AMD is one of the leading causes of blindness.

7. There are currently no treatments available.

8. Vision loss due to advanced dry AMD can lead to difficulty in reading, driving, and recognizing people’s faces.

**BASE: ALL QUALIFIED RESPONDENTS**

**Q802** What type or types of eye care professionals, if any, do you currently see to monitor your **advanced dry AMD**? Please select all that apply/Please give me a ‘yes’ or ‘no’ for each.

[MULTIPLE RESPONSE; RANDOMIZE] [ANCHOR CODE 5-6,99; EXCLUSIVE CODES 6,99] [SUPPRESS CODE 1 FOR GERMANY (dmCntry/85)]

1. Optometrist

2. Low vision specialist

3. General ophthalmologist

4. Retina specialist

5. Another type of eye care professional (for example, optician, orthoptist or nurse)

6. None – I/You do not currently see any eye care professional to monitor my advanced dry AMD.]

99. NOT SURE/REFUSED

**BASE: RESPONDENTS WHO SEE AN EYE CARE PROFESSIONAL (Q802/1-5)**

**Q803** About how often do you see the eye care professional primarily responsible for monitoring your **advanced dry AMD**?

1. Every 3 months or more
2. Every 6 months
3. Every 12 months
4. Between once a year and once in 2 years
5. Once in 2 years
6. Less than once in 2 years

99. NOT SURE/REFUSED

**BASE: RESPONDENTS WHO SEE AN EYE CARE PROFESSIONAL (Q802/1-5)**

**Q805** How often do you typically discuss the following with the eye care professional primarily responsible for monitoring your **advanced dry AMD**?

[IF PHONE SHOW: How often do you typically discuss (SHOW/READ ROW)?

(SHOW/READ COLUMNS 1-5 IN OPPOSITE ORDER FROM 5 TO 1) (READ COLUMNS FOR EACH STATEMENT)]

[COLUMN]

- - 1. Never
    2. During less than half of visits
    3. During about half of visits
    4. During more than half of visits
    5. During every visit
    6. Not sure or don’t know

[ROWS; RANDOMIZE] [HOLD 4-5 TOGETHER]

- - - 1. Challenges due to vision loss or impairments (for example, difficulty reading text in printed materials or inability to do routine tasks)
      2. Availability of support groups or resources
      3. Treatment options, including clinical trials
      4. Difficulty driving at any time of day
      5. Difficulty driving at night (in the dark)
      6. Different tools that could help daily life (for example, magnification software or screen reader software)
      7. Referral for low vision specialists
      8. Current disease state and how it has changed from previous visits
      9. How I/you am/are managing or monitoring my/your disease at home, (for example, Amsler grid or vitamins)
      10. How to find or get financial assistance from the government (in other words, monetary help for the visually impaired)

**BASE: ALL QUALIFIED RESPONDENTS**

**Q807** IF ONLINE AND CAREGIVER SHOW: As a reminder, please answer each question from the perspective of the individual you are taking the survey for.

IF ONLINE SHOW:How long after your diagnosis did you notice your vision decline or worsen due to **advanced dry AMD**? If it was less than a year after diagnosis, please enter 0.

IF PHONE SHOW:How long after your diagnosis did you notice your vision decline or worsen due to **advanced dry AMD** or had your vision started to decline or worsen prior to your diagnosis or has your vision not yet started to decline or worsen?

[_|_] years after diagnosis with advanced dry AMD [RANGE 0-(current year-value at Q630)]

97. My/Your vision started to decline or worsen prior to my diagnosis

98. My/Your vision has not started to worsen or decline]

99. NOT SURE/REFUSED

**BASE: ALL QUALIFIED RESPONDENTS**

**Q808** As far as you know or can recall, what prompted your diagnosis of **advanced dry AMD**?

Please select all that apply/ Please give me a ‘yes’ or ‘no’ for each.

[MULTIPLE RESPONSE; RANDOMIZE] [ANCHOR 96-99; EXCLUSIVE 97,99]

- - - - 1. Changes to my/your vision (for example, blurry spots, difficulty driving at night)
        2. A routine eye exam
        3. A routine eye appointment for another condition I/you am/are managing
        4. An eye surgery appointment
        5. Something else
        6. Not sure or don’t recall

99. REFUSED

**BASE: ALL QUALIFIED RESPONDENTS**

**Q810** Thinking about life prior to your diagnosis of **advanced dry AMD**, which of the following challenges, if any, did you experience due to vision loss or impairments? Please select all that apply/ Please give me a ‘yes’ or ‘no’ for each.

[RANDOMIZE; MULTIPLE RESPONSE] [KEEP 1-2, 3-4 TOGETHER] [ANCHOR CODE 96-99; EXCLUSIVE CODE 97,99]

1. Difficulty driving at any time of day
2. Difficulty driving at night (in the dark)
3. Difficulty reading text in printed materials (for example, books, newspapers or bank account statements)
4. Difficulty reading text on a screen (for example, computers, phones, tablets or social media)
5. Difficulty watching TV or movies
6. Difficulty working or volunteering
7. Difficulty differentiating colors
8. Difficulty recognizing people’s faces
9. Difficulty adjusting my/your vision to changes in light (for example, moving from sunshine into shade and vice versa, or turning on a lamp)
10. Increased dependency on caregivers
11. Increased use of different types of magnification and/or lighting devices
12. Increased falls or injuries
13. Another challenge
14. None – I/You did not experience any challenges prior to my/your diagnosis of advanced dry AMD

99. NOT SURE/REFUSED

**BASE: ALL QUALIFIED RESPONDENTS**

**Q825** As a reminder, please answer each question from the perspective of the individual you are taking the survey for.

How much do you agree or disagree with the following statement about **advanced dry AMD**?

The first/next one is (SAY FIRST FOR FIRST ROW AND NEXT FOR ALL FOLLOWING ROWS; READ ROW).

Do you (READ SCALE FOR EACH)?]

[COLUMN; FOR PHONE, SHOW/READ COLUMNS 1-4 IN OPPOSITE ORDER FROM 4 TO 1]

1. Strongly disagree

2. Somewhat disagree

3. Somewhat agree

4. Strongly agree

5. Not applicable [ONLY SHOW/READ FOR 3, 5 AND 6] [FOR PHONE SHOW: “or is it not applicable]

99. NOT SURE/REFUSED

[ROWS; RANDOMIZE]

1. I/You would’ve enjoyed life more if I/you had known the potential consequences of its progression.

Prior to my diagnosis, I/you attributed my/your loss of vision to a natural part of aging.

1. I/You am/are no longer able to be as independent as I’d/you’d like due to loss of vision.
2. I/You would be willing to try a new treatment to slow the progression and preserve my/your vision.
3. The impact on my/your vision is happening or has happened faster than I/you expected.

The impact of my/your vision decline on my/your quality of life and independence is worse than I/you expected.

**BASE: ALL QUALIFIED RESPONDENTS**

**Q830** How much do you agree or disagree with the following statement about **advanced dry AMD**?

The first/next one is (SAY FIRST FOR FIRST ROW AND NEXT FOR ALL FOLLOWING ROWS; READ ROW).

Do you (READ SCALE FOR EACH)?]

[COLUMN; FOR PHONE, SHOW/READ COLUMNS 1-4 IN OPPOSITE ORDER FROM 4 TO 1]

1. Strongly disagree

2. Somewhat disagree

3. Somewhat agree

4. Strongly agree

5. Not applicable/or is it not applicable

99. NOT SURE/REFUSED

[ROWS; RANDOMIZE]

1. I/You wish, at the time of my/your diagnosis, I/you had more information about my/your condition to prepare for the impact of disease progression.
2. I/You wish, at the time of my/your diagnosis, I/you understood how the disease works and the disease process better.
3. I/You wish, at the time of my/your diagnosis, I/you understood the irreversible impact it would have on my/your vision.
4. Before being diagnosed, I/you wish I had known my/your vision loss was not just a natural part of aging.
5. I/You didn’t give much thought to my eye care until I/you started experiencing problems with my vision due to my disease.
6. I/you wish, at the time of diagnosis, there was a treatment I/you could have started using to prevent or slow disease progression and vision loss.

**SECTION 900: IMPACT ON DAILY ACTIVITIES/QUALITY OF LIFE**

**BASE: ALL QUALIFIED RESPONDENTS**

**Q900** IF ONLINE AND CAREGIVER SHOW: As a reminder, please answer each question from the perspective of the individual you are taking the survey for.

How much of a negative impact, if any, has **advanced dry AMD** had on the following aspect of your life?

The first/next one is (SAY FIRST FOR FIRST ROW AND NEXT FOR ALL FOLLOWING ROWS; READ ROW).

Has it had (READ SCALE FOR EACH) or is it not applicable?

[COLUMN; FOR PHONE, SHOW/READ COLUMNS 1-4 IN OPPOSITE ORDER FROM 4 TO 1]

1. No negative impact

2. Slight negative impact

3. Moderate negative impact

4. Major negative impact

5. Not applicable

99. NOT SURE/REFUSED

[ROW; RANDOMIZE] [HOLD 3-5 TOGETHER HOLDING 3-4 TOGETHER IN ORDER]

1. My/Your finances
2. My/Your mental health
3. My/Your relationship with my spouse or significant other
4. My/Your relationships with other family members
5. My/Your relationships with friends
6. My/Your ability to work or volunteer
7. My/Your ability to participate in the hobbies and social activities I enjoy
8. My/Your ability to be independent
9. My/Your ability to take care of myself
10. My/Your ability to drive
11. My/Your ability to read
12. My/Your self-confidence
13. My/Your ability to travel as much as I would like

**BASE: ALL QUALIFIED RESPONDENTS**

**Q905** How much, if at all, has your vision loss or impairment as a result of **advanced dry AMD** impacted your ability to do the following activity?

The first/next one is (SAY FIRST FOR FIRST ROW AND NEXT FOR ALL FOLLOWING ROWS; READ ROW).

Would you say (READ SCALE FOR EACH) or is it not applicable…?

[COLUMNS FOR PHONE, SHOW/READ COLUMNS 1-4 IN OPPOSITE ORDER FROM 4 TO 1]

1. I/You have given this up entirely
2. I/You have reduced time spent doing this
3. I/You still do this as much as I/you would like, but with difficulty
4. I/You still do this as much as I/you would like with no difficulty

5. Not applicable

99. NOT SURE/REFUSED

[ROWS; RANDOMIZE BUT KEEP CODES 1-2, 3-4 TOGETHER]

1. Driving at any time of day

2. Driving at night (in the dark)

3. Reading text in printed materials (for example, books, newspapers or bank account statements)

4. Reading text on a screen (for example, computers, phones, tablets or social media)

5. Watching TV or movies

6. Socializing with friends or family

7. Exercising

8. Completing household chores (for example, cleaning, cooking or yard work)

9. Traveling

10. Shopping (for example, for clothes or groceries)

11. Maintaining personal grooming (for example, shaving, brushing hair or clipping nails)

12. Pursuing hobbies

13. Working or volunteering

**BASE: ALL QUALIFIED RESPONDENTS**

**Q907** How much do you agree or disagree with the following statement about the impact of **advanced dry AMD** on your life?

The first/next one is (SAY FIRST FOR FIRST ROW AND NEXT FOR ALL FOLLOWING ROWS; READ ROW). Do you (READ SCALE FOR EACH)?

[COLUMN][ONLY SHOW/READ 5 TO ROWS 1-7; FOR PHONE, SHOW/READ COLUMNS 1-4 IN OPPOSITE ORDER FROM 4 TO 1]

1. Strongly disagree
2. Somewhat disagree
3. Somewhat agree
4. Strongly agree
5. Not applicable/is it not applicable?

99. NOT SURE/REFUSED

[RANDOMIZE] [SHOW CODE 5 ONLY IF Q802/1-5] [HOLD ITEMS 1-2 AND 5,7 TOGETHER]

1. I/You feel embarrassed when I/you cannot recognize the faces of friends or family.
2. I/You feel frustrated when I/you cannot recognize the faces of friends or family.
3. I/You have withdrawn from my social life due to my/your advanced dry AMD.
4. I/You feel uncomfortable asking for help due to my/your advanced dry AMD.
5. I/You feel frustrated that my eye care professional does not fully appreciate my/your challenges related to my/your vision loss or impairment.
6. I/You feel dependent on others due to my/your vision loss.
7. I/You feel frustrated that my/your family does not fully appreciate my/your challenges related to my/your vision loss.
8. I’m/You’re fearful for what the future holds if my/your vision continues to decline.

**BASE: ALL QUALIFIED RESPONDENTS**

**Q908** [IF ONLINE AND CAREGIVER SHOW: As a reminder, please answer each question from the perspective of the individual you are taking the survey for.]

How much do you agree or disagree with the following statement?

The first/next one is (SAY FIRST FOR FIRST ROW AND NEXT FOR ALL FOLLOWING ROWS; READ ROW).

Do you (READ SCALE FOR EACH)?

[COLUMN][ONLY SHOW/READ COLUMN 5 FOR CODES 1,2,4,5; FOR PHONE, SHOW/READ COLUMNS 1-4 IN OPPOSITE ORDER FROM 4 TO 1]

1. Strongly disagree

2. Somewhat disagree

3. Somewhat agree

4. Strongly agree

5. Not applicable/is it not applicable?

99. NOT SURE/REFUSED (DO NOT READ)

[ROWS; RANDOMIZE]

- 1. I/You find it difficult to admit my/your vision loss to my/your friends or family.
  2. I/You feel comfortable talking about my/your experiences with vision loss with my/your friends or family.
  3. I/You struggle to accept that my/your vision may decline as my/your disease progresses.
  4. It's difficult for me/you to accept that I/you am no longer completely independent due to my/your vision loss or impairment.
  5. I/You find it hard to enjoy my/your life fully the way I/you once did before my/your diagnosis with advanced dry AMD.

**BASE: ALL QUALIFIED RESPONDENTS**

**Q909** Which of the following adjectives describe how you feel as a result of your vision loss or impairment due to **advanced dry AMD**? Please select all that apply/ Please give me a ‘yes’ or ‘no’ for each.

[MULTIPLE RESPONSE; RANDOMIZE] [ANCHOR CODE 96-99; CODE 97,99 EXCLUSIVE]

1. Scared
2. Embarrassed
3. Hopeless
4. Isolated
5. Lonely
6. Anxious
7. Frustrated
8. Powerless
9. Indifferent
10. Accepting
11. Resilient
12. Hopeful
13. Angry
14. Confused
15. None of these
16. My/Your vision has not started to worsen or decline

99. NOT SURE/REFUSED

**BASE: ALL QUALIFIED RESPONDENTS**

**Q910** How often do you fall or injure yourself?

[IF ONLINE AND CAREGIVER SHOW: As a reminder, please answer each question from the perspective of the individual you are taking the survey for.]

Never

Less often than once a month

Once a month

A few times a month

Once a week

A few times a week

Once a day

Several times a day

99. NOT SURE/REFUSED

**BASE: EXPERIENCE FALLS/INJURIES (Q910/2-8)**

**Q912** What proportion of those falls or injuries, if any, do you think are due to your vision loss or impairment because of your **advanced dry advanced dry AMD**? Please use your best estimate/Would you say…?

1. None
2. A few
3. Many
4. Most
5. Nearly all

99. NOT SURE/REFUSED

**BASE: ALL QUALIFIED RESPONDENTS**

**Q915** In which of the following ways, if any, has your **advanced dry AMD** affected your personal finances or financial security? Please select all that apply/Please give me a ‘yes’ or ‘no’ for each.

[RANDOMIZE; MULTIPLE RESPONSE] [HOLD 1-2 TOGETHER IN ORDER] [ANCHOR CODE 9-99; EXCLUSIVE CODE 10,99]

1. I/You have high out-of-pocket costs
2. I/You have had to reduce spending in other areas to be able to afford out-of-pocket costs
3. I/You have had to take money out of my savings account
4. I/You have had to take money out of my/your 401K or retirement account/retirement funds
5. I/You have been unable to pay bills
6. I/You have lost income due to being unable to work
7. I/You have had to ask family members or friends for a loan
8. I/You have no longer been able to work to supplement my income
9. Some other financial effects
10. None – My/Your advanced dry AMD has not financially affected me/you in any way.

99. NOT SURE/REFUSED

**SECTION 1000: TREATMENT/CARE**

**BASE: ALL QUALIFIED RESPONDENTS**

**Q1000** Which of the following tasks, if any, have you had to rely on a caregiver to help you with due to your vision loss or impairment as a result of **advanced dry AMD**? Please select all that apply/ Please give me a ‘yes’ or ‘no’ for each.

[IF ONLINE AND CAREGIVER SHOW: As a reminder, please answer each question from the perspective of the individual you are taking the survey for.]

[RANDOMIZE BUT KEEP ITEMS 1-2, 3-4 TOGETHER; MULTIPLE RESPONSE] [ANCHOR CODE 96-99; EXCLUSIVE CODE 97,99]

1. Driving at any time of day
2. Driving at night (in the dark)
3. Reading text in printed materials for me/you (for example, books, newspapers, bank account statements)
4. Reading text on a screen for me/you (for example, computers, phones, tablets, social media)
5. Completing household chores (for example, cleaning, cooking or yard work)
6. Shopping (for example, for clothes or groceries)
7. Maintaining personal grooming (for example, shaving, brushing hair or clipping nails)
8. Picking up prescriptions
9. Paying bills
10. Doing repairs around my/your home
11. Some other task or tasks
12. None – I/You have not had to rely on a caregiver to help me/you with any tasks due to my/your vision loss or impairment

99. NOT SURE/REFUSED (DO NOT READ)

**BASE: ALL QUALIFIED RESPONDENTS**

**Q1005** How long after you first received your diagnosis of **advanced dry AMD**,if at all, did you begin relying on a caregiver to help you due to your vision loss or impairment/ or have you not begun relying on a caregiver to help you or were you relying on one before you were diagnosed? If it was less than a year after diagnosis, please enter 0.

[_|_] years after diagnosis with advanced dry AMD [RANGE 0-(current year-value at Q630]

1. Not applicable – I/You have not begun relying on a caregiver to help me/you
2. I/You was/were relying on a caregiver before I/you was diagnosed with advanced dry AMD

99. NOT SURE/REFUSED

**BASE: ALL RESPONDENTS**

**Q645** Which of the following best describes where you currently live? Please select one.

[SINGLE RESPONSE; RANDOMIZE; ANCHOR 5, 99]

- 1. At home by myself/yourself]
  2. At home with family
  3. At home with daytime caregiver assistance at least 2 days per week
  4. Assisted living facility
  5. Some other living situation

99. NOT SURE/REFUSED

**BASE: CURRENTLY LIVES AT HOME WITH DAYTIME CAREGIVER OR ASSISTED LIVING FACILITY (Q645/3 OR 4)**

**Q650** What is the primary reason you have a daytime caregiver/assisted living facility?

1. Advanced dry AMD and related vision loss

2. Other reasons

99. NOT SURE/REFUSED

**BASE: RESPONDENTS WHO RELY ON CAREGIVER (Q1005/NOT 96,99)**

**Q1008** You indicated that you rely on a caregiver to help you due to your vision loss or impairment. Which of the following people do you rely on as a caregiver?

Please select all that apply/ Please give me a ‘yes’ or ‘no’ for each.

[MULTIPLE RESPONSE; RANDOMIZE] [HOLD 1-4 TOGETHER AND ANCHOR 4] [ANCHOR CODE 7,99; EXCLUSIVE 99]

1. My/Your spouse or partner
2. My/Your child(ren)
3. A sibling
4. Another relative
5. A close friend
6. A professional or paid caregiver
7. Someone else

99. NOT SURE/REFUSED

**BASE: ALL QUALIFIED RESPONDENTS**

**Q1015** How much do you agree or disagree with the following statement about your **advanced dry AMD**?

The first/next one is (SAY FIRST FOR FIRST ROW AND NEXT FOR ALL FOLLOWING ROWS; READ STATEMENT).

Do you (READ SCALE FOR EACH)…?

[COLUMN; FOR PHONE, SHOW/READ COLUMNS 1-4 IN OPPOSITE ORDER FROM 4 TO 1]

1. Strongly disagree

2. Somewhat disagree

3. Somewhat agree

4. Strongly agree

99. NOT SURE/REFUSED

[RANDOMIZE][HOLD 4-5 TOGETHER] [ONLY SHOW 1-2 TO THOSE WHO SEE AN ECP (Q802/1-5)]

1. I/You want more support from my/your eye care professional.
2. I/You trust my/your eye care professional to make treatment decisions on my/your behalf.
3. I/You wish to be empowered with more information and options to take control over my/your disease.
4. I/You wish there were more educational materials available for both patients and caregivers.
5. I/You wish there were more support groups available for both patients and caregivers.

**SECTION: CUSTOM DEMOGRAPHICS**

**BASE: ALL RESPONDENTS**

**Q660** Which of the following statements best describes your employment status?

1. Employed full time

2. Employed part time

3. Unemployed

4. Retired

5. Doing volunteer or unpaid work

6. Other

99. NOT SURE/REFUSED

**SECTION: INDIVIDUAL COUNTRY DEMOGRAPHICS**

**US DEMOGRAPHICS**

**BASE: ALL U.S. RESPONDENTS**

**Q1010B**     Which type of health plan or health insurance, if any, do you currently have for yourself?

[IF ONLINE AND CAREGIVER SHOW: As a reminder, please answer each question from the perspective of the individual you are taking the survey for.]

Please select all that apply/ Please give me a ‘yes’ or ‘no’ for each.

-

[5 (Medicare) cannot be selected with 7 (VA); 6 (Medicaid) cannot be selected with 1, 2, 3, OR 4 (any type of private plan); 97 should be exclusive]

1. Health care coverage through my/your work or union
2. Health care coverage through someone else’s work or union
3. Health care coverage through the individual market (individual, family or small business) not through healthcare.gov or a state-based exchange
4. Health care coverage through the individual market through healthcare.gov or a state-based exchange
5. Medicare or a Medicare HMO, which is a government plan that pays health care bills for people age 65 and older and for some people with disabilities
6. Medicaid, a Medicaid HMO, Medi-Cal or public aid
7. VA benefits from my/your own service or through my/your spouse
8. Some other type of health plan or coverage
9. I/You have no health insurance coverage.

99. NOT SURE/REFUSED

**BASE: ALL U.S. RESPONDENTS**

**dmStateUS [State (US)]** In what state or territory do you currently reside?

1. Alabama

2. Alaska

3. Arizona

4. Arkansas

5. California

6. Colorado

7. Connecticut

8. Delaware

9. District of Columbia

10. Florida

11. Georgia

12. Hawaii

13. Idaho

14. Illinois

15. Indiana

16. Iowa

17. Kansas

18. Kentucky

19. Louisiana

20. Maine

21. Maryland

22. Massachusetts

23. Michigan

24. Minnesota

25. Mississippi

26. Missouri

27. Montana

28. Nebraska

29. Nevada

30. New Hampshire

31. New Jersey

32. New Mexico

33. New York

34. North Carolina

35. North Dakota

36. Ohio

37. Oklahoma

38. Oregon

39. Pennsylvania

40. Rhode Island

41. South Carolina

42. South Dakota

43. Tennessee

44. Texas

45. Utah

46. Vermont

47. Virginia

48. Washington

49. West Virginia

50. Wisconsin

51. Wyoming

52. American Samoa

53. Federated States of Micronesia

54. Guam

55. Marshall Islands

56. Northern Mariana Islands

57. Palau

58. Puerto Rico

59. Virgin Islands

99. NOT SURE/REFUSED

**BASE: ALL US RESPONDENTS**

**dmZipUS [Zip Code (US)]** What is your zip code?

99. NOT SURE/REFUSED

**BASE: ALL US RESPONDENTS**

**dmHispUS [Hispanic Origin (US)]** Are you of Hispanic, Latino, or Spanish origin?

1. Yes

2. No

99. NOT SURE/REFUSED

**BASE: ALL US RESPONDENTS**

**dmRaceMUS [Race-Multi (US)]** What is your race?

Please select all that apply/ Please give me a ‘yes’ or ‘no’ for each.]

1. White

2. Black or African American

3. Native American or Alaskan Native

4. South Asian

5. Chinese

6. Korean

7. Japanese

8. Filipino

9. Arab/Middle Eastern/West Asian

12. Vietnamese

11. Other Asian

10. Native Hawaiian or Pacific Islander

13. Other race

99. NOT SURE/REFUSED

**SECTION: CANADA DEMOGRAPHICS**

**BASE: ALL CANADA RESPONDENTS**

**dmRegionCA** **[Region (Canada)]** In which province or territory do you currently reside?

[IF ONLINE AND CAREGIVER SHOW: As a reminder, please answer each question from the perspective of the individual you are taking the survey for.]

1. Alberta

2. British Columbia

3. Manitoba

4. New Brunswick

5. Newfoundland & Labrador

6. Northwest Territories

7. Nova Scotia

8. Nunavut

9. Ontario

10. Prince Edward Island

11. Quebec

12. Saskatchewan

13. Yukon

99. NOT SURE/REFUSED

**BASE: CANADA RESPONDENT and language FOR WEIGHTING to be asked**

**dmFluencyCA**   **[Fluency (Canada)]** Which of the following languages can you speak well enough to conduct a conversation?

1.            English

2.            French

3.            Both English and French

4.            Neither English nor French

99. NOT SURE/REFUSED

**BASE:  ALL CANADA RESPONDENTS**

**dmRaceCA   [Race (Canada)]** Do you consider yourself…?

1. White

2. Black

3. First Nation/Native Canadian

4. South Asian

5. Chinese

6. Korean

7. Japanese

8. Other Asian

9. Filipino

10. Arab/West Asian

11. Pacific Islander

12. Mixed Race

13. Some other race

99. Prefer not to answer

**SECTION: FRANCE DEMOGRAPHICS**

**ALL FRANCE RESPONDENTS**

**dmRegionFR [Region (France)]** In what region or territory do you currently reside?

[IF ONLINE AND CAREGIVER SHOW: As a reminder, please answer each question from the perspective of the individual you are taking the survey for.]

1. Auvergne-Rhône-Alpes
2. Bourgogne- Franche-Comté
3. Breton (Brittany)
4. Centre-Val de Loire
5. Corse (Corsica)
6. Grand Est (Alsace, Champagne-Ardenne, Lorraine)
7. Hauts-de-France
8. Île de France
9. Normandie (Normandy)
10. Nouvelle Aquitaine (Aquitaine, Limousin, Poitou-Charentes)
11. Occitaine
12. Pays de la Loire

13. Provence-Alpes-Côte d'Azur

99. NOT SURE/REFUSED

**SECTION: AUSTRALIA DEMOGRAPHICS**

BASE: ALL AUstralia respondents

**dmRegionAU [Region (Australia)]** In which state or territory do you currently reside?

[IF ONLINE AND CAREGIVER SHOW: As a reminder, please answer each question from the perspective of the individual you are taking the survey for.]

1. Sydney

2. Other New South Wales

3. Melbourne

4. Other Victoria

5. Brisbane

6. Other Queensland

7. Adelaide

8. Other South Australia

9. Perth

10. Other Western Australia

11. Hobart

12. Other Tasmania

13. ACT

14. Northern Territory

99. NOT SURE/REFUSED

**SECTION: GERMANY DEMOGRAPHICS**

**BASE: ALL GERMANY RESPONDENTS**

**dmRegionDE [Region (Germany)]** In which state or territory do you currently reside?

[IF ONLINE AND CAREGIVER SHOW: As a reminder, please answer each question from the perspective of the individual you are taking the survey for.]

1. Baden-Wurttemberg

2. Bavaria

3. Berlin

4. Brandenburg

5. Bremen

6. Hamburg

7. Hesse

8. Mecklenburg-Western Pomerania

9. Lower Saxony

10. North Rhine-Westphalia

11. Rhineland-Palatinate

12. Saarland

13. Saxony

14. Saxony-Anhalt

15. Schleswig-Holstein

16. Thuringia

99. NOT SURE/REFUSED

**SECTION: ITALY DEMOGRAPHICS**

**ALL ITALY RESPONDENTS**

**dmRegionIT [Region (Italy)]** In which region or territory do you currently reside?

[IF ONLINE AND CAREGIVER SHOW: As a reminder, please answer each question from the perspective of the individual you are taking the survey for.]

1. Abruzzo

2. Valle d'Aosta

3. Apulia (Puglia)

4. Basilicata

5. Provincia Autonoma di Bolzano

6. Calabria

7. Campania

8. Emilia-Romagna

9. Friuli-Venezia Giulia

10. Lazio

11. Liguria

12. Lombardia

13. Marche

14. Molise

15. Piedmont

16. Sardinia/Sardegna

17. Sicilia

18. Provincia Autonoma di Trento (Trentino Alto Adige)

19. Toscana

20. Umbria

21. Veneto

**SECTION: UNITED KINGDOM DEMOGRAPHICS**

**ALL UNITED KINGDOM RESPONDENTS**

**dmRegionUK [Region (UK)]** In which region or territory do you currently reside?

[IF ONLINE AND CAREGIVER SHOW: As a reminder, please answer each question from the perspective of the individual you are taking the survey for.]

1. East of England

2. East Midlands

3. London

4. North East

5. North West

6. Northern Ireland

7. Scotland

8. South East

9. South West

10. Wales

11. West Midlands

12. Yorkshire and the Humber

99. NOT SURE/REFUSED

**SECTION: NETHERLANDS DEMOGRAPHICS**

**BASE: ALL NETHERLANDS RESPONDENTS**

**dmRegionNL** **[Region (Netherlands)]**In which province do you currently reside?

[IF ONLINE AND CAREGIVER SHOW: As a reminder, please answer each question from the perspective of the individual you are taking the survey for.]

1. Drenthe

2. Flevoland

3. Friesland

4. Gelderland

5. Groningen

6. Limburg

7. Noord-Brabant

8. Noord-Holland

9. Overijssel

10. Utrecht

11. Zeeland

12. Zuid-Holland

**SECTION: SWEDEN DEMOGRAPHICS**

BASE: ALL Sweden respondents

**dmRegionSE** **[Region (Sweden)]** In which district or regiondo you currently reside?

[IF ONLINE AND CAREGIVER SHOW: As a reminder, please answer each question from the perspective of the individual you are taking the survey for.]

1. Blekinge

2. Dalarna

3. Gavleborg

4. Gotland

5. Halland

6. Jamtland

7. Jonkoping

8. Kalmar

9. Kronoberg

10. Norrbotten

11. Orebro

12. Ostergotland

13. Skane

14. Sodermanland

15. Stockholm

16. Uppsala

17. Varmland

18. Vasterbotten

19. Vasternorrland

20. Vastmanland

21. Vastra Gotaland

**SECTION: DEMOGRAPHICS (FOR ALL COUNTRIES)**

**BASE: ALL RESPONDENTS AND 18+**

**dmMarStat [Marital Status]** What is your marital status?

1. Never married

2. Married or civil union

3. Divorced

4. Separated

5. Widowed

6. Living with partner

99. NOT SURE/REFUSED

**BASE: ALL RESPONDENTS**

**Q1320** Which of the following best describes the location where you live?

1. Inner city
2. Urban
3. Suburban
4. Small town
5. Rural

99. NOT SURE/REFUSED

# **Supplementary Table S1.** Extended patient characteristics and interactions with eye care professionals (ECPs)

| **n (%)** | **Total**  **N = 203** | **Bilateral GA**  **n = 86** | **Unilateral GA**  **n = 117** | **P-value*** |
| --- | --- | --- | --- | --- |
| **Country of residencea** |  |  |  |  |
| Australia | 6 (3) | 2 (2) | 4 (4) | .371 |
| Canada | 12 (6) | 1 (1) | 10 (9) | .019 |
| France | 21 (10) | 8 (10) | 13 (11) | .450 |
| Germany | 28 (14) | 6 (7) | 23 (19) | .008 |
| Italy | 21 (10) | 13 (15) | 8 (6) | .042 |
| Netherlands | 5 (3) | 1 (1) | 4 (4) | .295 |
| Sweden | 3 (1) | 0 (0) | 3 (3) | .189 |
| United Kingdom | 19 (9) | 5 (6) | 14 (12) | .114 |
| United States | 87 (43) | 49 (57) | 39 (33) | <.001 |
| **Current living situation** |  |  |  |  |
| At home with family | 171 (84) | 67 (78) | 104 (88) | .021 |
| At home by self | 17 (8) | 10 (11) | 7 (6) | .085 |
| At home with caregiver assistance at least 2 days per week | 10 (5) | 7 (8) | 3 (3) | .039 |
| Assisted living facility | 5 (3) | 2 (2) | 3 (3) | .443 |
| **Frequency of reported falls or injuries** |  |  |  |  |
| Never | 52 (26) | 22 (25) | 31 (26) | .248 |
| Less than once a month | 77 (38) | 44 (52) | 33 (28) | <.001 |
| Once a month | 18 (9) | 7 (9) | 11 (9) | .363 |
| A few times per month | 26 (13) | 2 (3) | 23 (20) | <.001 |
| One or more times per week | 26 (13) | 8 (9) | 19 (16) | .259 |
| Not sure/Refused | 4 (2) | 2 (3) | 1 (1) |  |
| **Proportion of falls or injuries that respondents believe are due to vision loss because of GA** |  |  |  |  |
| A few | 77 (52) | 35 (57) | 42 (49) | .224 |
| Many | 32 (22) | 9 (14) | 24 (28) | .026 |
| Most | 23 (15) | 11 (17) | 12 (14) | .064 |
| **Types of ECPs seen for advanced dry AMD** |  |  |  |  |
| General ophthalmologist | 108 (53) | 49 (57) | 59 (51) | .184 |
| Retina Specialist | 95 (47) | 36 (42) | 59 (50) | .095 |
| Low vision specialist | 82 (40) | 24 (28) | 58 (50) | <.001 |
| Optometrist | 75 (37) | 26 (31) | 49 (42) | .013 |
| Another type of ECPs (e.g., optician, orthoptists, nurse) | 20 (10) | 5 (6) | 15 (13) | .084 |
| **Recalled reason that prompted diagnosis of advanced dry AMD**b |  |  |  |  |
| Routine eye exam | 136 (67) | 59 (69) | 76 (65) | .375 |
| Changes to my visionc | 103 (51) | 38 (44) | 65 (55) | .054 |
| A routine eye exam for a separate condition | 63 (31) | 21 (24) | 42 (36) | .043 |
| Eye surgery appointment | 43 (21) | 7 (8) | 36 (31) | <.001 |
| Something else | 15 (8) | 5 (5) | 11 (9) | .158 |
| **Frequency of visit to ECP primarily responsible for monitoring advanced dry AMD** |  |  |  |  |
| Every 3 months | 63 (31) | 37 (43) | 26 (22) | .001 |
| Every 6 months | 84 (41) | 33 (39) | 51 (43) | .143 |
| Every 12 months | 39 (19) | 16 (19) | 23 (20) | .368 |
| More than every 12 months | 17 (8) | 0 (0) | 17 (15) | <.001 |
| **Respondents incorrectly answering “True” or “Not Sure” to the statement: The rate of progression is the same for most patients** | 110 (54) | 50 (59) | 59 (50) | .102 |
| Note: The sample size (n) and percentages (%) for all rows are based on weighted data and therefore do not reflect the exact number of participant responses  Abbreviations: GA, geographic atrophy; AMD, age-related macular degeneration; ECP, eye care professionals  *P-values are shown for comparisons between Bilateral and Unilateral GA cohorts  a The post-weight applied to each country in the full analysis taking into account the country’s total population was 43.1% for the United States, 9.3% for United Kingdom, 3.2% for Australia, 5.7% for Canada, 10.4% for France, 14.0% for Germany, 10.2% for Italy, 2.6% for Netherlands, 1.5% for Sweden. Total adult population values were sourced from the U.S. Census Bureau’s Current Population Survey 2020 and International Database 2021.  b Respondent answers from selecting all that apply  c For example, blurry spots, difficulty driving at night | | | | |

# **Supplementary Table S2.** Symptoms currently experienced by respondents

| **Symptoms, n (%)** | **Total**  **N = 203** | **Bilateral GA**  **n = 86** | **Unilateral GA**  **n = 117** | **P-Value*** |
| --- | --- | --- | --- | --- |
| The need for brighter light when reading or doing close-up work | 173 (85) | 82 (95) | 91 (78) | <.001 |
| Inability to drive at night (in the dark) due to vision loss or impairment | 169 (83) | 81 (95) | 88 (75) | <.001 |
| Reduced central vision in one or both eyes | 151 (74) | 70 (82) | 81 (69) | .015 |
| Inability to read or severe difficulty when readinga | 134 (66) | 62 (72) | 72 (61) | .061 |
| Difficulty adjusting your vision to changes in lightb | 132 (65) | 71 (83) | 61 (52) | <.001 |
| Difficulty following lines when reading text in printed materialsc | 132 (65) | 64 (74) | 68 (58) | .010 |
| Decreased intensity or brightness of colors | 122 (60) | 58 (68) | 64 (54) | .062 |
| A well-defined blurry spot or blind spot in your field of vision | 108 (53) | 53 (62) | 55 (47) | .013 |
| The need for a magnifier when reading or doing close-up work | 100 (49) | 51 (60) | 49 (42) | .004 |
| Inability to drive at any time of day due to vision loss or impairment | 100 (49) | 47 (55) | 52 (44) | .064 |
| Challenges carrying out daily tasks due to vision loss or impairment | 96 (47) | 42 (49) | 54 (46) | .467 |
| Visual distortions, such as straight lines seeming bent | 86 (43) | 41 (48) | 45 (38) | .137 |
| Note: The sample size (n) and percentages (%) for all rows are based on weighted data and therefore do not reflect the exact number of participant responses  Abbreviations: GA, geographic atrophy  *P-values are shown for comparisons between Bilateral and Unilateral GA cohorts  a For example, decrease in reading speed or missing letters while reading  b For example, moving from sunshine into shade and vice versa or turning on a lamp  c For example, books or newspapers | | | | |

# **Supplementary Table S3.** Which of the following adjectives describe how you feel as a result of your vision loss or impairment due to advanced dry AMD?

| **Adjectives, n (%)** | **Total**  **N = 203** | **Bilateral GA**  **n = 86** | **Unilateral GA**  **n = 117** | **P-Value*** |
| --- | --- | --- | --- | --- |
| Anxious | 94 (46) | 37 (43) | 57 (49) | .195 |
| Powerless | 80 (39) | 38 (44) | 42 (36) | .101 |
| Frustrated | 68 (33) | 37 (43) | 31 (26) | .005 |
| Accepting | 66 (33) | 28 (33) | 38 (33) | .494 |
| Hopeless | 57 (28) | 23 (26) | 35 (29) | .307 |
| Scared | 56 (28) | 30 (35) | 27 (23) | .043 |
| Angry | 50 (25) | 27 (31) | 23 (20) | .068 |
| Lonely | 46 (22) | 16 (19) | 29 (25) | .204 |
| Embarrassed | 44 (22) | 22 (25) | 22 (19) | .120 |
| Confused | 42 (21) | 17 (20) | 25 (21) | .463 |
| Hopeful | 39 (19) | 17 (20) | 22 (19) | .413 |
| Isolated | 30 (15) | 8 (9) | 23 (19) | .033 |
| Resilient | 30 (15) | 14 (16) | 16 (14) | .286 |
| Indifferent | 12 (6) | 4 (4) | 8 (7) | .095 |
| None of these | 3 (2) | 2 (3) | 1 (1) | .204 |
| Note: The sample size (n) and percentages (%) for all rows are based on weighted data and therefore do not reflect the exact number of participant responses  Abbreviations: GA, geographic atrophy; AMD, age-related macular degeneration  *P-values are shown for comparisons between Bilateral and Unilateral GA cohorts | | | | |
